# Supplementary material
Source: publisher site journal article supplement (https://jmir.org/api/download?alt_name=iproc_v8i1e36466_app1.docx&filename=00eeea5581c59ccc3cbbeb6356d3edf3.docx)
Supplement: Supplementary file 1 [file download]

| **No.** | **Name** | **Residence** | **Age** | **Sex** | **Marriage status** | **Education** | **Occupation** | **Symptoms** | | | | | | | | | | | | | | **Risk factors** | | | | | | | | | **Note** |
| --- | --- | --- | --- | --- | --- | --- | --- | --- | --- | --- | --- | --- | --- | --- | --- | --- | --- | --- | --- | --- | --- | --- | --- | --- | --- | --- | --- | --- | --- | --- | --- |
| **Date Of Onset** | **Fever** | **Headache** | **Myalgia** | **Arthralgia** | **Skin Rashes** | **Retro Orbital Pain** | **Diarrhea** | **Vomiting** | **RTI** | **Fatigue** | **Jaundice** | **Oliguria/Anuria** | **Hemorrhage/ Bleeding** | **Storage of water in a container** | **Uncovered water containers** | **Environmental sanitation** | **Repellents use** | **Mosquito net use** | **Windows mosquito net** | **Wearing short sleeves / pants** | **Travel within 15days** | **Presence of larvae** |  |
| **1** |  |  |  |  |  |  |  |  |  |  |  |  |  |  |  |  |  |  |  |  |  |  |  |  |  |  |  |  |  |  |  |
| **2** |  |  |  |  |  |  |  |  |  |  |  |  |  |  |  |  |  |  |  |  |  |  |  |  |  |  |  |  |  |  |  |
| **3** |  |  |  |  |  |  |  |  |  |  |  |  |  |  |  |  |  |  |  |  |  |  |  |  |  |  |  |  |  |  |  |
| **4** |  |  |  |  |  |  |  |  |  |  |  |  |  |  |  |  |  |  |  |  |  |  |  |  |  |  |  |  |  |  |  |
| **5** |  |  |  |  |  |  |  |  |  |  |  |  |  |  |  |  |  |  |  |  |  |  |  |  |  |  |  |  |  |  |  |
| **6** |  |  |  |  |  |  |  |  |  |  |  |  |  |  |  |  |  |  |  |  |  |  |  |  |  |  |  |  |  |  |  |
| **7** |  |  |  |  |  |  |  |  |  |  |  |  |  |  |  |  |  |  |  |  |  |  |  |  |  |  |  |  |  |  |  |
